# Supplementary material for: Estimation of ground-level particulate matter concentrations through the synergistic use of satellite observations and process-based models over South Korea
Source: Copernicus journal article supplement (doi:10.5194/acp-19-1097-2019), 2019-01-28
Supplement: Supplementary file 1 [file acp-19-1097-2019-supplement.zip]

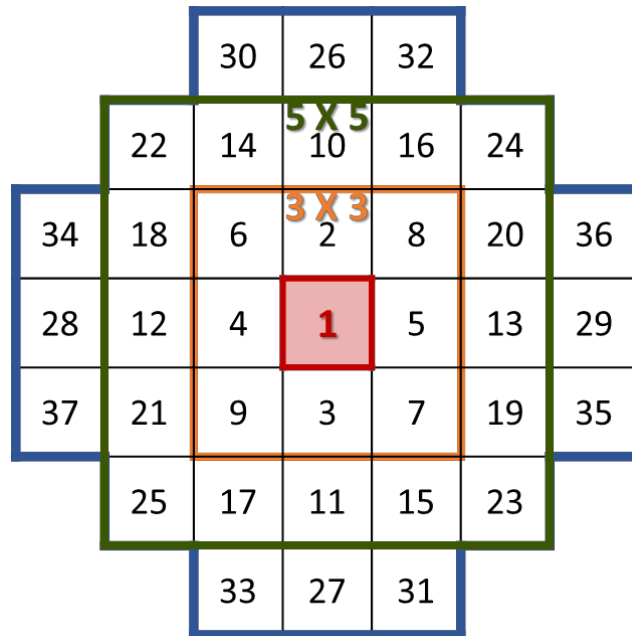

**Figure S1:** The pixels within the circular neighbouring window with a radius of 3 pixels considered for oversampling. The number in each pixel indicates the order of inclusion of the pixel for oversampling. For example, oversampling for pixels of an interval might be conducted for first three pixels following the order, while oversampling for pixels of another interval might be conducted for up to the 13<sup>th</sup> pixel within the window.
