# Supplementary material for: Estimation of ground-level particulate matter concentrations through the synergistic use of satellite observations and process-based models over South Korea
Source: Copernicus journal article supplement (doi:10.5194/acp-19-1097-2019), 2019-01-28
Supplement: Supplementary file 2 [file acp-19-1097-2019-supplement.zip]

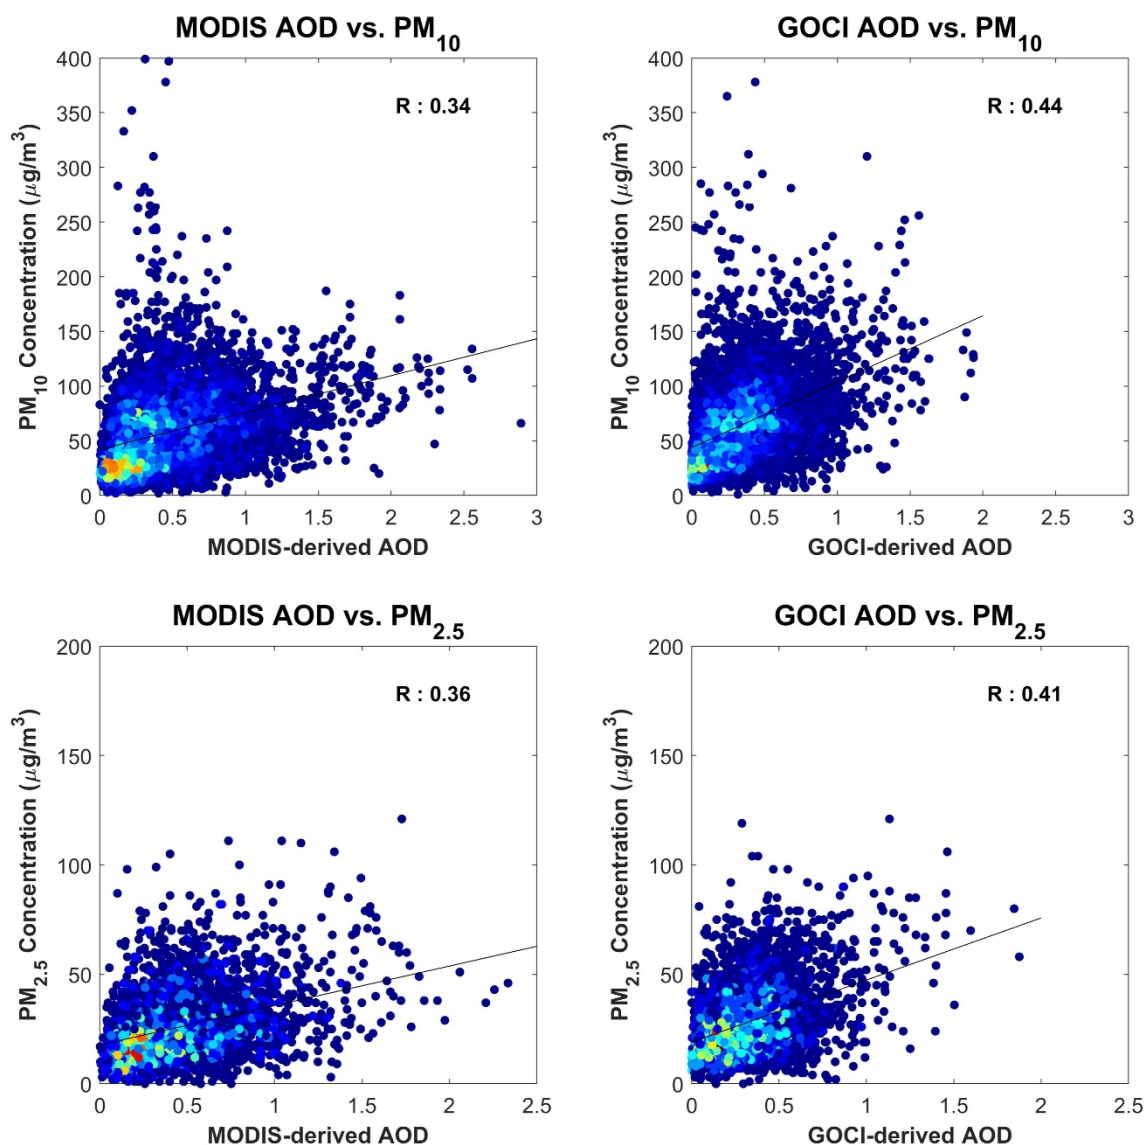

**Figure S2: Comparison of PM concentrations to MODIS-derived AOD (left column) and GOCI-derived AOD (right column). The colour scheme from blue to red indicates the point density: The blue point means low density while the red point shows high density.**
