# Supplementary material for: Estimation of ground-level particulate matter concentrations through the synergistic use of satellite observations and process-based models over South Korea
Source: Copernicus journal article supplement (doi:10.5194/acp-19-1097-2019), 2019-01-28
Supplement: Supplementary file 3 [file acp-19-1097-2019-supplement.zip]

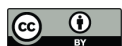

## *Supplement of*

# **Estimation of ground-level particulate matter concentrations through the synergistic use of satellite observations and process-based models over South Korea**

**Seohui Park et al.**

*Correspondence to:* Jungho Im ([ersgis@unist.ac.kr](mailto:ersgis@unist.ac.kr))

- [acp-19-1097-2019-supplement-title-page.pdf](#)
- [FigureS1.pdf](#)
- [FigureS2.pdf](#)

The copyright of individual parts of the supplement might differ from the CC BY 4.0 License.
